# Supplementary material
Source: PubMed Central journal article supplement (PMC9633407)
Supplement: NIHMS1832418-supplement-Supplement.pdf [file NIHMS1832418-supplement-Supplement.pdf]

Tertiary children’s hospitals in sample by inpatient psychiatric unit status, location, and start dates for statewide school closure and stay at home or shelter in place orders.

| Hospital                                                             | Inpatient<br>Psychiatric Unit | Location |                           | Start Date of Statewide Orders <sup>a</sup> |                                   |
|----------------------------------------------------------------------|-------------------------------|----------|---------------------------|---------------------------------------------|-----------------------------------|
|                                                                      |                               | State    | City                      | School closure                              | Stay at home/<br>shelter in place |
| Children's of Alabama                                                | Yes                           | AL       | Birmingham                | 3/19/20                                     | 4/3/20                            |
| Arkansas Children's Hospital                                         | No                            | AR       | Little Rock               | 3/17/20                                     | 3/26/20                           |
| Phoenix Children's Hospital                                          | Yes                           | AZ       | Phoenix                   | 3/16/20                                     | 3/31/20                           |
| Valley Children's Healthcare                                         | No                            | CA       | Madera                    | 3/19/20                                     | 3/19/20                           |
| Children's Hospital Los Angeles                                      | No                            | CA       | Los Angeles               | 3/19/20                                     | 3/19/20                           |
| UCSF Benioff Children's Hospital Oakland                             | No                            | CA       | Oakland                   | 3/19/20                                     | 3/19/20                           |
| Miller Children's & Women's Hospital Long Beach                      | No                            | CA       | Long Beach                | 3/19/20                                     | 3/19/20                           |
| Rady Children's Hospital San Diego                                   | Yes                           | CA       | San Diego                 | 3/19/20                                     | 3/19/20                           |
| CHOC Children's                                                      | Yes                           | CA       | Orange                    | 3/19/20                                     | 3/19/20                           |
| Children's Hospital Colorado                                         | Yes                           | CO       | Denver                    | 3/23/20                                     | 3/26/20                           |
| Connecticut Children's Medical Center                                | No                            | CT       | Hartford                  | 3/17/20                                     | 3/23/20                           |
| Yale New Haven Children's Hospital                                   | Yes                           | CT       | New Haven                 | 3/17/20                                     | 3/23/20                           |
| Nicklaus Children’s Hospital                                         | Yes                           | FL       | Miami                     | 3/17/20                                     | 4/3/20                            |
| Children's Healthcare of Atlanta                                     | No                            | GA       | Atlanta                   | 3/18/20                                     | 4/3/20                            |
| Comer Children's Hospital at University of Chicago<br>Medical Center | No                            | IL       | Chicago                   | 3/17/20                                     | 3/21/20                           |
| Ann & Robert H. Lurie Children's Hospital of Chicago                 | Yes                           | IL       | Chicago                   | 3/17/20                                     | 3/21/20                           |
| Advocate Children's Hospital                                         | Yes                           | IL       | Chicago                   | 3/17/20                                     | 3/21/20                           |
| Riley Hospital for Children at Indiana University Health             | No                            | IN       | Indianapolis              | 3/19/20                                     | 3/24/20                           |
| Norton Children's Hospital                                           | Yes                           | KY       | Louisville                | 3/16/20                                     | 3/26/20                           |
| Boston Children's Hospital                                           | Yes                           | MA       | Boston                    | 3/16/20                                     | 3/24/20                           |
| C.S. Mott Children's Hospital                                        | Yes                           | MI       | Ann Arbor                 | 3/16/20                                     | 3/24/20                           |
| Children's Minnesota                                                 | No                            | MN       | Minneapolis -<br>St. Paul | 3/18/20                                     | 3/27/20                           |
| Children's Mercy Kansas City                                         | No                            | MO       | Kansas City               | 3/23/20                                     | 4/6/20                            |
| St. Louis Children's Hospital                                        | Yes                           | MO       | St. Louis                 | 3/23/20                                     | 4/6/20                            |

|                                                     |     |    |                |         |         |
|-----------------------------------------------------|-----|----|----------------|---------|---------|
| Levine Children's Hospital                          | No  | NC | Charlotte      | 3/16/20 | 3/30/20 |
| Children's Hospital & Medical Center                | No  | NE | Omaha          | 3/16/20 | NA      |
| Akron Children's Hospital                           | Yes | OH | Akron          | 3/17/20 | 3/23/20 |
| Nationwide Children's Hospital                      | Yes | OH | Columbus       | 3/17/20 | 3/23/20 |
| Cincinnati Children's Hospital Medical Center       | Yes | OH | Cincinnati     | 3/17/20 | 3/23/20 |
| UH Rainbow Babies & Children's Hospital             | Yes | OH | Cleveland      | 3/17/20 | 3/23/20 |
| UPMC Children's Hospital of Pittsburgh              | No  | PA | Pittsburgh     | 3/16/20 | 4/1/20  |
| Children's Hospital of Philadelphia                 | Yes | PA | Philadelphia   | 3/16/20 | 4/1/20  |
| MUSC Shawn Jenkins Children's Hospital              | No  | SC | Charleston     | 3/15/20 | 4/6/20  |
| Le Bonheur Children's Hospital                      | No  | TN | Memphis        | 3/20/20 | 3/31/20 |
| Monroe Carell Jr. Children's Hospital at Vanderbilt | Yes | TN | Nashville      | 3/20/20 | 3/31/20 |
| Texas Children's Hospital                           | No  | TX | Houston        | 3/19/20 | 3/31/20 |
| Children's Memorial Hermann Hospital                | No  | TX | Houston        | 3/19/20 | 3/31/20 |
| Cook Children's Medical Center                      | Yes | TX | Fort Worth     | 3/19/20 | 3/31/20 |
| Children's Health, Dallas                           | Yes | TX | Dallas         | 3/19/20 | 3/31/20 |
| Dell Children's Medical Center of Central Texas     | Yes | TX | Austin         | 3/19/20 | 3/31/20 |
| Primary Children's Hospital                         | Yes | UT | Salt Lake City | 3/16/20 | 3/27/20 |
| Children's Hospital of The King's Daughters, Inc.   | No  | VA | Norfolk        | 3/16/20 | 3/30/20 |
| Seattle Children's                                  | Yes | WA | Seattle        | 3/17/20 | 3/23/20 |
| Children's Wisconsin                                | No  | WI | Milwaukee      | 3/18/20 | 3/25/20 |

NA=not applicable. <sup>a</sup>abstracted dates from eTable 1, Auger KA, Shah SS, Richardson T, et al. Association between statewide school closure and COVID-19 incidence and mortality in the U.S. *AMA*. Doi: 10:1001/jama.2020.14348. For Arkansas, the data source for start date statewide shelter at home start date is the Governor's Executive Order, available at [https://governor.arkansas.gov/images/uploads/executiveOrders/EO\\_20-25...pdf](https://governor.arkansas.gov/images/uploads/executiveOrders/EO_20-25...pdf). Accessed 12/21/21

Absolute number of and percent change in emergency department discharges and hospitalizations for all causes, primary general medical diagnoses, and primary mental health diagnoses in 44 children’s hospitals pre- and post-COVID-19 statewide school closure orders matched by 36- (spring-fall) and 12-week (season) time intervals.

|                  | Spring-Fall |        |          | Spring |        |          | Summer |        |          | Fall   |        |          |
|------------------|-------------|--------|----------|--------|--------|----------|--------|--------|----------|--------|--------|----------|
|                  | Pre         | Post   | % change | Pre    | Post   | % change | Pre    | Post   | % change | Pre    | Post   | % change |
|                  | N           | N      |          | N      | N      |          | N      | N      |          | N      | N      |          |
| Any Acute Care   |             |        |          |        |        |          |        |        |          |        |        |          |
| All Causes       | 1704932     | 953542 | -44.1%   | 601035 | 249097 | -58.6%   | 495927 | 337893 | -31.9%   | 607970 | 366552 | -39.7%   |
| Primary GM       | 1632806     | 894915 | -45.2%   | 575089 | 234619 | -59.2%   | 478233 | 320165 | -33.1%   | 579484 | 340131 | -41.3%   |
| Primary MH       | 72126       | 58627  | -18.7%   | 25946  | 14478  | -44.2%   | 17694  | 17728  | 0.2%     | 28486  | 26421  | -7.2%    |
| ED Discharges    |             |        |          |        |        |          |        |        |          |        |        |          |
| All Causes       | 1394564     | 721425 | -48.3%   | 495452 | 187901 | -62.1%   | 397029 | 254762 | -35.8%   | 502083 | 278762 | -44.5%   |
| Primary GM       | 1348391     | 686685 | -49.1%   | 478722 | 179805 | -62.4%   | 386363 | 244398 | -36.7%   | 483306 | 262482 | -45.7%   |
| Primary MH       | 46173       | 34740  | -24.8%   | 16730  | 8096   | -51.6%   | 10666  | 10364  | -2.8%    | 18777  | 16280  | -13.3%   |
| Hospitalizations |             |        |          |        |        |          |        |        |          |        |        |          |
| All Causes       | 310368      | 232117 | -25.2%   | 105583 | 61196  | -42.0%   | 98898  | 83131  | -15.9%   | 105887 | 87790  | -17.1%   |
| Primary GM       | 284415      | 208230 | -26.8%   | 96367  | 54814  | -43.1%   | 91870  | 75767  | -17.5%   | 96178  | 77649  | -19.3%   |
| Primary MH       | 25953       | 23887  | -8.0%    | 9216   | 6382   | -30.8%   | 7028   | 7364   | 4.8%     | 9709   | 10141  | 4.4%     |

36-week time intervals compared for spring-fall are 3/18/19-11/24/19 vs. 3/16/20-11/22/20. 12-week seasonal time intervals compared by season are: spring 3/18/19-6/9/19 vs.3/16/20-6/7/20,summer 6/10/19-9/1/19 vs. 6/8/20-8/30/20, fall 9/2/19-11/24/19 vs. 8/31/20-11/22/20. Seasonal time intervals correspond to 12 calendar weeks starting on Monday. ED=emergency department. All p-values are <.001.

Percent change in emergency department discharges and hospitalizations for all causes, primary general medical diagnoses, and primary mental health diagnoses in 44 U.S. children's hospitals pre- and post-COVID-19 statewide school closure orders matched by 36-week (spring-fall) intervals by child sociodemographic characteristics, payer type, and complex chronic condition count.

|                | Spring-Fall |          |          |                         |          |          |                       |          |          |
|----------------|-------------|----------|----------|-------------------------|----------|----------|-----------------------|----------|----------|
|                | All Causes  |          |          | Primary General Medical |          |          | Primary Mental Health |          |          |
|                | Any         | ED       | Hospital | Any                     | ED       | Hospital | Any                   | ED       | Hospital |
|                | % change    | % change | % change | % change                | % change | % change | % change              | % change | % change |
| Age (years)    | ***         | ***      | ***      | ***                     | ***      | ***      | ***                   | ***      | **       |
| 3-5            | -51.8%      | -54.2%   | -37.6%   | -51.9%                  | -54.2%   | -37.8%   | -27.9%                | -35.3%   | -7.5%    |
| 6-11           | -47.1%      | -50.4%   | -30.3%   | -47.3%                  | -50.6%   | -30.4%   | -37.6%                | -41.4%   | -27.5%   |
| 12-17          | -33.8%      | -39.8%   | -14.4%   | -36.0%                  | -41.5%   | -16.5%   | -12.3%                | -17.9%   | -3.5%    |
| Sex            | *           | *        | **       |                         |          |          | ***                   | ***      | ***      |
| Male           | -45.5%      | -49.6%   | -27.5%   | -46.1%                  | -50.0%   | -28.0%   | -30.3%                | -34.8%   | -20.2%   |
| Female         | -42.5%      | -46.9%   | -22.8%   | -44.2%                  | -48.1%   | -25.5%   | -9.7%                 | -15.8%   | -0.5%    |
| Race/ethnicity | ***         | ***      | *        | ***                     | ***      |          | **                    |          |          |
| White          | -38.2%      | -42.8%   | -23.1%   | -39.6%                  | -43.9%   | -24.9%   | -15.0%                | -20.8%   | -5.9%    |
| Black          | -47.2%      | -50.3%   | -28.4%   | -48.0%                  | -50.8%   | -29.9%   | -24.8%                | -30.7%   | -12.1%   |
| Hispanic       | -48.4%      | -52.2%   | -25.2%   | -49.1%                  | -52.7%   | -26.2%   | -24.1%                | -30.2%   | -10.0%   |
| Other          | -46.8%      | -51.1%   | -29.0%   | -48.1%                  | -52.1%   | -30.8%   | -15.5%                | -19.9%   | -8.6%    |
| Payer          | ***         | ***      | **       | ***                     | ***      | ***      | ***                   | ***      | ***      |
| Government     | -45.6%      | -49.6%   | -24.5%   | -46.5%                  | -50.3%   | -25.7%   | -21.6%                | -27.1%   | -11.1%   |
| Commercial     | -40.2%      | -44.5%   | -25.5%   | -41.5%                  | -45.4%   | -27.6%   | -14.9%                | -21.8%   | -4.2%    |
| Self-pay       | -53.1%      | -55.8%   | -23.4%   | -54.1%                  | -56.5%   | -24.8%   | -20.6%                | -24.5%   | -8.6%    |
| Other          | -36.1%      | -37.9%   | -32.0%   | -36.5%                  | -38.2%   | -32.8%   | -17.3%                | -22.8%   | -9.5%    |
| Missing        | -52.6%      | -54.4%   | -45.0%   | -54.5%                  | -56.3%   | -46.7%   | -6.6%                 | -3.7%    | -15.2%   |
| CCC Count      | ***         | ***      | ***      | ***                     | ***      | ***      |                       |          |          |
| 0              | -46.1%      | -48.7%   | -27.4%   | -47.3%                  | -49.5%   | -29.9%   | -19.8%                | -24.9%   | -9.3%    |
| 1              | -29.8%      | -39.5%   | -23.5%   | -30.7%                  | -40.0%   | -24.6%   | -4.8%                 | -19.4%   | 0.3%     |
| ≥2             | -22.1%      | -34.5%   | -20.1%   | -22.3%                  | -34.7%   | -20.3%   | -8.9%                 | -17.4%   | -7.4%    |

36-week time intervals compared for spring-fall are 3/18/19-11/24/19 vs. 3/16/20-11/22/20. CCC= Complex Chronic Conditions. \*p<.05, \*\*p<.01, \*<.001.

Percent change in emergency department discharges and hospitalizations for primary mental health diagnoses among 44 children’s hospitals pre- and post-COVID-19 statewide school closure orders matched by 12-week intervals (season) by child sociodemographic characteristics, payer type, complex chronic condition count, and prior 6-month acute mental health care.

|                                        | Spring-Fall |        |          | Spring |        |          | Summer |         |          | Fall   |        |          |
|----------------------------------------|-------------|--------|----------|--------|--------|----------|--------|---------|----------|--------|--------|----------|
|                                        | Any         | ED     | Hospital | Any    | ED     | Hospital | Any    | ED      | Hospital | Any    | ED     | Hospital |
| Age (years)                            |             |        |          |        |        |          |        |         |          |        |        |          |
| 3-5                                    | -27.9%      | -35.3% | -7.5%    | -44.6% | -50.8% | -27.3%   | -13.4% | -17.9%  | -3.7%    | -24.6% | -34.6% | +9.0%    |
| 6-11                                   | -37.6%      | -41.4% | -27.5%   | -60.1% | -64.4% | -48.0%   | -17.2% | -20.1%  | -10.5%   | -28.0% | -31.2% | -18.9%   |
| 12-17                                  | -12.3%      | -17.9% | -3.5%    | -38.7% | -46.3% | -26.7%   | +5.9%  | +4.2%   | +8.2%    | 0.0%   | -5.7%  | +9.7%    |
| Sex                                    |             |        |          |        |        |          |        |         |          |        |        |          |
| Male                                   | -30.3%      | -34.8% | -20.2%   | -49.6% | -55.6% | -35.9%   | -11.3% | --14.6% | -5.3%    | -24.3% | -27.5% | -16.6%   |
| Female                                 | -9.7%       | -15.8% | -0.5%    | -40.0% | -48.0% | -27.7%   | +9.1%  | +7.5%   | +11.1%   | +6.2%  | -0.6%  | +17.3%   |
| Race/ethnicity                         |             |        |          |        |        |          |        |         |          |        |        |          |
| White                                  | -15.0%      | -20.8% | -5.9%    | -41.3% | -49.4% | -28.6%   | +5.4%  | +2.8%   | +8.7%    | -3.8%  | -9.1%  | +5.0%    |
| Black                                  | -24.8%      | -30.7% | -12.1%   | -51.0% | -55.7% | -40.7%   | -6.2%  | -10.2%  | +1.4%    | -11.4% | -19.2% | +7.0%    |
| Hispanic                               | -24.1%      | -30.2% | -10.0%   | -47.1% | -54.1% | -30.7%   | -8.8%  | -12.2%  | -2.3%    | -13.0% | -19.5% | +3.9%    |
| Other                                  | -15.5%      | -19.9% | -8.6%    | -39.5% | -48.1% | -25.1%   | +4.0%  | +6.2%   | +1.1%    | -6.0%  | -9.0%  | -1.0%    |
| Payer                                  |             |        |          |        |        |          |        |         |          |        |        |          |
| Government                             | -21.6%      | -27.1% | -11.1%   | -45.2% | -51.7% | -32.4%   | -5.2%  | -8.4%   | +0.1%    | -10.5% | -16.0% | + 1.0%   |
| Commercial                             | -14.9%      | -21.8% | -4.2%    | -43.2% | -52.4% | -28.6%   | +7.9%  | +5.2%   | +11.4%   | -2.8%  | -9.2%  | + 7.9%   |
| Self-pay                               | -20.6%      | -24.5% | -8.6%    | -42.8% | -46.7% | -31.7%   | +0.9%  | +0.2%   | +2.7%    | -13.7% | -19.5% | + 6.8%   |
| Other                                  | -17.3%      | -22.8% | -9.5%    | -49.4% | -51.5% | -46.4%   | +2.9%  | +21.2%  | -15.7%   | +0.5%  | -17.9% | +31.9%   |
| Missing                                | -6.6%       | -3.7%  | -15.2%   | -22.1% | -24.8% | -13.9%   | -6.9%  | +1.1%   | -25.6%   | +7.4%  | +11.2% | -5.4%    |
| %                                      |             |        |          |        |        |          |        |         |          |        |        |          |
| CCC Count                              |             |        |          |        |        |          |        |         |          |        |        |          |
| 0                                      | -19.8%      | -24.9% | -9.3%    | -45.1% | -51.9% | -30.8%   | -1.0%  | -2.9%   | +2.5%    | -8.3%  | -13.2% | +2.7%    |
| 1                                      | -4.8%       | -19.4% | 0.3%     | -32.1% | -39.6% | -29.6%   | +13.3% | -0.6%   | 17.9%    | +7.5%  | -14.7% | +16.2%   |
| ≥2                                     | -8.9%       | -17.4% | -7.4%    | -35.3% | -41.9% | -34.5%   | +9.1%  | +5.9%   | +9.6%    | +1.4%  | -18.0% | +5.5%    |
| Acute mental health care/past 6 months |             |        |          |        |        |          |        |         |          |        |        |          |
| Any                                    | -19.1%      | -25.5% | -11.3%   | -37.5% | -44.7% | -28.8%   | -4.3%  | -9.9%   | +2.1%    | -10.7% | -16.7% | -3.1%    |
| Any ED                                 | -24.9%      | -28.3% | -18.5%   | -41.5% | -47.3% | -30.4%   | -12.9% | -13.3%  | -12.2%   | -15.9% | -18.7% | -10.3%   |
| Any hospital                           | -10.7%      | -14.8% | -7.9%    | -28.0% | -33.2% | -24.7%   | +5.7%  | +5.2%   | +5.9%    | -5.6%  | -11.3% | -1.5%    |

12-week time intervals compared by season are: spring 3/18/19-6/9/19 vs. 3/16/20-6/7/20, summer 10/19-9/1/19 vs. 6/8/20-8/30/20, fall 9/2/19-11/24/19 vs.8/31/20-11/22/20. CCC= Complex Chronic Conditions.

Prevalence of all primary mental health diagnoses for emergency department discharges and hospitalizations in 44 U.S. children's hospitals pre- and post-COVID-19 statewide school closure orders matched by 36-week (spring-fall) intervals.

| Spring-Fall    |                                                      |        |      |                                                      |        |      |
|----------------|------------------------------------------------------|--------|------|------------------------------------------------------|--------|------|
| Any Acute Care |                                                      |        |      |                                                      |        |      |
| Rank           | Pre-COVID 19 School Closures<br>(N=71,460)           |        |      | Post-COVID 19 School Closures<br>(N=57,788)          |        |      |
|                | Mental Health Condition                              | N      | %    | Mental Health Condition                              | N      | %    |
| 1              | Depressive Disorders                                 | 18,998 | 26.6 | Suicide or Self-Injury                               | 16,604 | 28.7 |
| 2              | Suicide or Self-Injury                               | 17,029 | 23.8 | Depressive Disorders                                 | 15,122 | 26.2 |
| 3              | Disruptive, Impulse Control and Conduct Disorders    | 6,782  | 9.5  | Anxiety Disorders                                    | 5,007  | 8.7  |
| 4              | Anxiety Disorders                                    | 6,329  | 8.9  | Disruptive, Impulse Control and Conduct Disorders    | 4,125  | 7.1  |
| 5              | Trauma and Stressor-Related Disorders                | 4,038  | 5.7  | Trauma and Stressor-Related Disorders                | 3,074  | 5.3  |
| 6              | Mental Health Symptom                                | 3,636  | 5.1  | Mental Health Symptom                                | 2,573  | 4.5  |
| 7              | Miscellaneous                                        | 2,707  | 3.8  | Feeding and Eating Disorders                         | 1,886  | 3.3  |
| 8              | Substance-Related and Addictive Disorders            | 2,253  | 3.2  | Substance-Related and Addictive Disorders            | 1,864  | 3.2  |
| 9              | ADHD                                                 | 1,777  | 2.5  | Miscellaneous                                        | 1,447  | 2.5  |
| 10             | Feeding and Eating Disorders                         | 1,667  | 2.3  | ADHD                                                 | 1,056  | 1.8  |
| 11             | Somatic Symptom and Related Disorders                | 1,403  | 2.0  | Autism Spectrum Disorder                             | 908    | 1.6  |
| 12             | Autism Spectrum Disorder                             | 1,053  | 1.5  | Somatic Symptom and Related Disorders                | 863    | 1.5  |
| 13             | Schizophrenia Spectrum and Other Psychotic Disorders | 795    | 1.1  | Motor Disorders                                      | 849    | 1.5  |
| 14             | Motor Disorders                                      | 746    | 1.0  | Schizophrenia Spectrum and Other Psychotic Disorders | 831    | 1.4  |
| 15             | Bipolar and Related Disorders                        | 745    | 1.0  | Bipolar and Related Disorders                        | 659    | 1.1  |
| 16             | Neurocognitive Disorders                             | 634    | 0.9  | Neurocognitive Disorders                             | 279    | 0.5  |
| 17             | Elimination Disorders                                | 234    | 0.3  | Elimination Disorders                                | 155    | 0.3  |
| 18             | Obsessive-Compulsive and Related Disorders           | 168    | 0.2  | Obsessive-Compulsive and Related Disorders           | 153    | 0.3  |

|               |                                                                                      |        |      |                                                                                      |        |      |
|---------------|--------------------------------------------------------------------------------------|--------|------|--------------------------------------------------------------------------------------|--------|------|
| 19            | Sleep-Wake Disorders                                                                 | 103    | 0.1  | Sleep-Wake Disorders                                                                 | 75     | 0.1  |
| 20            | Communication Disorders                                                              | 81     | 0.1  | Communication Disorders                                                              | 67     | 0.1  |
| 21            | Personality Disorders                                                                | 81     | 0.1  | Personality Disorders                                                                | 41     | 0.1  |
| 22            | Sexuality and Gender Identity Disorders                                              | 53     | 0.1  | Sexuality and Gender Identity Disorders                                              | 39     | 0.1  |
| 23            | Developmental Delay or Unspecified Neurodevelopmental Disorder                       | 39     | 0.1  | Maternal Mental Illness or Substance Abuse During Pregnancy, Delivery or Post-Partum | 33     | 0.1  |
| 24            | Intellectual Disability                                                              | 31     | 0.0  | Developmental Delay or Unspecified Neurodevelopmental Disorder                       | 30     | 0.1  |
| 25            | Maternal Mental Illness or Substance Abuse During Pregnancy, Delivery or Post-Partum | 29     | 0.0  | Intellectual Disability                                                              | 30     | 0.1  |
| 26            | Specific Learning Disorders                                                          | 25     | 0.0  | Specific Learning Disorders                                                          | 8      | 0.0  |
| 27            | Dissociative Disorders                                                               | 13     | 0.0  | Dissociative Disorders                                                               | 6      | 0.0  |
| 28            | Fetal or Newborn Damage Related to Maternal Substance Abuse                          | 7      | 0.0  | Fetal or Newborn Damage Related to Maternal Substance Abuse                          | 4      | 0.0  |
| 29            | Substance Abuse-Related Medical Illness                                              | 4      | 0.0  |                                                                                      |        |      |
| ED Discharges |                                                                                      |        |      |                                                                                      |        |      |
| 1             | Suicide or Self-Injury                                                               | 11,530 | 25.1 | Suicide or Self-Injury                                                               | 10,399 | 30.2 |
| 2             | Depressive Disorders                                                                 | 9,546  | 20.8 | Depressive Disorders                                                                 | 6,944  | 20.2 |
| 3             | Anxiety Disorders                                                                    | 5,488  | 12.0 | Anxiety Disorders                                                                    | 4,377  | 12.7 |
| 4             | Disruptive, Impulse Control and Conduct Disorders                                    | 4,861  | 10.6 | Disruptive, Impulse Control and Conduct Disorders                                    | 2,629  | 7.6  |
| 5             | Mental Health Symptom                                                                | 3,310  | 7.2  | Mental Health Symptom                                                                | 2,270  | 6.6  |
| 6             | Trauma and Stressor-Related Disorders                                                | 2,547  | 5.5  | Trauma and Stressor-Related Disorders                                                | 1,771  | 5.1  |
| 7             | Miscellaneous                                                                        | 1,900  | 4.1  | Substance-Related and Addictive Disorders                                            | 1,362  | 4.0  |
| 8             | Substance-Related and Addictive Disorders                                            | 1,741  | 3.8  | Miscellaneous                                                                        | 972    | 2.8  |
| 9             | ADHD                                                                                 | 1,299  | 2.8  | ADHD                                                                                 | 718    | 2.1  |

|                  |                                                                                      |     |     |                                                                                       |     |     |
|------------------|--------------------------------------------------------------------------------------|-----|-----|---------------------------------------------------------------------------------------|-----|-----|
| 10               | Autism Spectrum Disorder                                                             | 666 | 1.5 | Motor Disorders                                                                       | 716 | 2.1 |
| 11               | Motor Disorders                                                                      | 572 | 1.2 | Autism Spectrum Disorder                                                              | 569 | 1.7 |
| 12               | Neurocognitive Disorders                                                             | 515 | 1.1 | Feeding and Eating Disorders                                                          | 331 | 1.0 |
| 13               | Somatic Symptom and Related Disorders                                                | 507 | 1.1 | Somatic Symptom and Related Disorders                                                 | 283 | 0.8 |
| 14               | Schizophrenia Spectrum and Other Psychotic Disorders                                 | 295 | 0.6 | Schizophrenia Spectrum and Other Psychotic Disorders                                  | 277 | 0.8 |
| 15               | Bipolar and Related Disorders                                                        | 281 | 0.6 | Bipolar and Related Disorders                                                         | 221 | 0.6 |
| 16               | Feeding and Eating Disorders                                                         | 279 | 0.6 | Neurocognitive Disorders                                                              | 209 | 0.6 |
| 17               | Elimination Disorders                                                                | 172 | 0.4 | Elimination Disorders                                                                 | 101 | 0.3 |
| 18               | Sleep-Wake Disorders                                                                 | 88  | 0.2 | Obsessive-Compulsive and Related Disorders                                            | 78  | 0.2 |
| 19               | Obsessive-Compulsive and Related Disorders                                           | 74  | 0.2 | Sleep-Wake Disorders                                                                  | 62  | 0.2 |
| 20               | Personality Disorders                                                                | 62  | 0.1 | Communication Disorders                                                               | 44  | 0.1 |
| 21               | Communication Disorders                                                              | 53  | 0.1 | Intellectual Disability                                                               | 25  | 0.1 |
| 22               | Developmental Delay or Unspecified Neurodevelopmental Disorder                       | 26  | 0.1 | Personality Disorders                                                                 | 21  | 0.1 |
| 23               | Intellectual Disability                                                              | 21  | 0.0 | Developmental Delay or Unspecified Neurodevelopmental Disorder                        | 17  | 0.0 |
| 24               | Sexuality and Gender Identity Disorders                                              | 21  | 0.0 | Maternal Mental Illness or Substance Abuse During Pregnancy, Delivery or Post- Partum | 16  | 0.0 |
| 25               | Maternal Mental Illness or Substance Abuse During Pregnancy, Delivery or Post-Partum | 16  | 0.0 | Sexuality and Gender Identity Disorders                                               | 15  | 0.0 |
| 26               | Specific Learning Disorders                                                          | 13  | 0.0 | Dissociative Disorders                                                                | 5   | 0.0 |
| 27               | Dissociative Disorders                                                               | 6   | 0.0 | Specific Learning Disorders                                                           | 5   | 0.0 |
| 28               | Fetal or Newborn Damage Related to Maternal Substance Abuse                          | 6   | 0.0 | Fetal or Newborn Damage Related to Maternal Substance Abuse                           | 3   | 0.0 |
| 29               | Substance Abuse-Related Medical Illness                                              | 2   | 0.0 |                                                                                       |     |     |
| Hospitalizations |                                                                                      |     |     |                                                                                       |     |     |



|    |                                                      |       |      |                                                                                      |       |      |
|----|------------------------------------------------------|-------|------|--------------------------------------------------------------------------------------|-------|------|
| 1  | Depressive Disorders                                 | 9,452 | 37.0 | Depressive Disorders                                                                 | 8,178 | 35.0 |
| 2  | Suicide or Self-Injury                               | 5,499 | 21.5 | Suicide or Self-Injury                                                               | 6,205 | 26.6 |
| 3  | Disruptive, Impulse Control and Conduct Disorders    | 1,921 | 7.5  | Feeding and Eating Disorders                                                         | 1,555 | 6.7  |
| 4  | Trauma and Stressor-Related Disorders                | 1,491 | 5.8  | Disruptive, Impulse Control and Conduct Disorders                                    | 1,496 | 6.4  |
| 5  | Feeding and Eating Disorders                         | 1,388 | 5.4  | Trauma and Stressor-Related Disorders                                                | 1,303 | 5.6  |
| 6  | Somatic Symptom and Related Disorders                | 896   | 3.5  | Anxiety Disorders                                                                    | 630   | 2.7  |
| 7  | Anxiety Disorders                                    | 841   | 3.3  | Somatic Symptom and Related Disorders                                                | 580   | 2.5  |
| 8  | Miscellaneous                                        | 807   | 3.2  | Schizophrenia Spectrum and Other Psychotic Disorders                                 | 554   | 2.4  |
| 9  | Substance-Related and Addictive Disorders            | 512   | 2.0  | Substance-Related and Addictive Disorders                                            | 502   | 2.2  |
| 10 | Schizophrenia Spectrum and Other Psychotic Disorders | 500   | 2.0  | Miscellaneous                                                                        | 475   | 2.0  |
| 11 | ADHD                                                 | 478   | 1.9  | Bipolar and Related Disorders                                                        | 438   | 1.9  |
| 12 | Bipolar and Related Disorders                        | 464   | 1.8  | Autism Spectrum Disorder                                                             | 339   | 1.5  |
| 13 | Autism Spectrum Disorder                             | 387   | 1.5  | ADHD                                                                                 | 338   | 1.4  |
| 14 | Mental Health Symptom                                | 326   | 1.3  | Mental Health Symptom                                                                | 303   | 1.3  |
| 15 | Motor Disorders                                      | 174   | 0.7  | Motor Disorders                                                                      | 133   | 0.6  |
| 16 | Neurocognitive Disorders                             | 119   | 0.5  | Obsessive-Compulsive and Related Disorders                                           | 75    | 0.3  |
| 17 | Obsessive-Compulsive and Related Disorders           | 94    | 0.4  | Neurocognitive Disorders                                                             | 70    | 0.3  |
| 18 | Elimination Disorders                                | 62    | 0.2  | Elimination Disorders                                                                | 54    | 0.2  |
| 19 | Sexuality and Gender Identity Disorders              | 32    | 0.1  | Sexuality and Gender Identity Disorders                                              | 24    | 0.1  |
| 20 | Communication Disorders                              | 28    | 0.1  | Communication Disorders                                                              | 23    | 0.1  |
| 21 | Personality Disorders                                | 19    | 0.1  | Personality Disorders                                                                | 20    | 0.1  |
| 22 | Sleep-Wake Disorders                                 | 15    | 0.1  | Maternal Mental Illness or Substance Abuse During Pregnancy, Delivery or Post-Partum | 17    | 0.1  |

|    |                                                                                      |    |     |                                                                |    |     |
|----|--------------------------------------------------------------------------------------|----|-----|----------------------------------------------------------------|----|-----|
| 23 | Developmental Delay or Unspecified Neurodevelopmental Disorder                       | 13 | 0.1 | Developmental Delay or Unspecified Neurodevelopmental Disorder | 13 | 0.1 |
| 24 | Maternal Mental Illness or Substance Abuse During Pregnancy, Delivery or Post-Partum | 13 | 0.1 | Sleep-Wake Disorders                                           | 13 | 0.1 |
| 25 | Specific Learning Disorders                                                          | 12 | 0.0 | Intellectual Disability                                        | 5  | 0.0 |
| 26 | Intellectual Disability                                                              | 10 | 0.0 | Specific Learning Disorders                                    | 3  | 0.0 |
| 27 | Dissociative Disorders                                                               | 7  | 0.0 | Dissociative Disorders                                         | 1  | 0.0 |
| 28 | Substance Abuse-Related Medical Illness                                              | 2  | 0.0 | Fetal or Newborn Damage Related to Maternal Substance Abuse    | 1  | 0.0 |
| 29 | Fetal or Newborn Damage Related to Maternal Substance Abuse                          | 1  | 0.0 |                                                                |    |     |

36-week time intervals compared for spring-fall are 3/18/19-10/24/19 vs. 3/16/20-11/22/20. Of the 5,580 primary diagnoses of mental health symptom, the most common were violent behavior (1328, 21.4%), restlessness and agitation (1034, 16.7%), other symptoms and signs involving emotional state (800, 12.9%), irritability and anger (747, 12.0%), and homicidal ideations (609, 10.5%).

Percent change in emergency department discharges and hospitalizations for primary mental health diagnoses among 44 children’s hospitals pre- and post-COVID-19 statewide school closure orders matched by 36-(spring-fall) and 12-week (season) intervals by mental health diagnostic group.

|                                                                       | Spring-Fall |        |          | Spring |        |          | Summer |        |          | Fall   |        |          |
|-----------------------------------------------------------------------|-------------|--------|----------|--------|--------|----------|--------|--------|----------|--------|--------|----------|
|                                                                       | Any         | ED     | Hospital | Any    | ED     | Hospital | Any    | ED     | Hospital | Any    | ED     | Hospital |
| Suicide or Self-Injury (n=33,633)                                     | -2.5%       | -9.8%  | 12.8%    | -36.6% | -44.7% | -19.8%   | 21.6%  | 22.6%  | 20.0%    | 16.3%  | 5.7%   | 41.7%    |
| Depressive Disorders (n=34,120)                                       | -20.4%      | -27.3% | -13.5%   | -48.3% | -57.9% | -38.6%   | 5.3%   | 9.7%   | 2.2%     | -9.0%  | -16.9% | 0.5%     |
| Anxiety or Trauma-related Disorders                                   |             |        |          |        |        |          |        |        |          |        |        |          |
| Anxiety Disorders (n=11,336)                                          | -20.9%      | -20.2% | -25.1%   | -41.4% | -42.0% | -37.5%   | -6.8%  | -6.7%  | -7.0%    | -13.1% | -10.7% | -27.0%   |
| Trauma and Stressor-Related Disorders (n=7,112)                       | -23.9%      | -30.5% | -12.6%   | -42.1% | -56.3% | -16.5%   | -8.4%  | -10.0% | -6.3%    | -17.9% | -20.2% | -13.8%   |
| Obsessive-Compulsive and Related Disorders (n=321)                    | -8.9%       | 5.4%   | -20.2%   | -28.6% | -51.7% | 5.0%     | -7.7%  | 40.9%  | -43.3%   | 4.5%   | 43.5%  | -15.9%   |
| Dissociative Disorders (n=19)                                         | -53.8%      | -16.7% | -85.7%   | -83.3% | -50.0% | 100.0%   | -75.0% | -50.0% | -100.0%  | 33.3%  | 50.0%  | 0.0%     |
| Any (n=18, 788)                                                       | -21.9%      | -23.2% | -17.4%   | -41.6% | -46.6% | -23.3%   | -7.5%  | -13.3% | -8.5%    | -14.8% | -13.5% | -18.7%   |
| Likely eligible for special education resources                       |             |        |          |        |        |          |        |        |          |        |        |          |
| ADHD (n=2833)                                                         | -40.6%      | -44.7% | -29.3%   | -58.3% | -64.3% | -39.2%   | -26.2% | -31.8% | -15.0%   | -33.1% | -33.5% | -31.9%   |
| Disruptive, Impulse Control and Conduct Disorders (n=10,907)          | -39.2%      | -45.9% | -22.1%   | -49.9% | -56.7% | -32.6%   | -30.3% | -36.5% | -17.0%   | -36.4% | -43.2% | -17.2%   |
| Specific Learning Disorders (n=33)                                    | -68.0%      | -61.5% | -75.0%   | -77.8% | -80.0% | -75.0%   | -50.0% | -66.7% | 0.0%     | -75.0% | 0.0%   | 100.0%   |
| Autism Spectrum Disorder (n=1,961)                                    | -13.8%      | -14.6% | -12.4%   | -36.9% | -36.8% | -37.1%   | -0.6%  | -7.8%  | 13.0%    | -0.8%  | 3.2%   | -7.2%    |
| Communication Disorders (n=148)                                       | -17.3%      | -17.0% | -17.9%   | -53.1% | -60.9% | -33.3%   | -7.4%  | 5.9%   | -30.0%   | 22.7%  | 30.8%  | 11.1%    |
| Developmental Delay or Unspecified Neurodevelopmental Disorder (n=69) | -23.1%      | -34.6% | 0.0%     | -58.3% | -87.5% | 0.0%     | -6.7%  | 0.0%   | -14.3%   | -8.3%  | -20.0% | 50.0%    |
| Intellectual Disability (n=61)                                        | -3.2%       | 19.0%  | -50.0%   | -35.7% | -50.0% | 50.0%    | 75.0%  | 200.0% | -50.0%   | 7.7%   | 85.7%  | -83.3%   |
| Any (n=16,012)                                                        | -36.4%      | -42.2% | -22.2%   | -50.1% | -56.3% | -34.2%   | -25.6% | -31.6% | -13.0%   | -31.2% | -37.0% | -18.9%   |

|                                                                    |        |        |        |         |        |        |        |        |        |        |        |        |
|--------------------------------------------------------------------|--------|--------|--------|---------|--------|--------|--------|--------|--------|--------|--------|--------|
| Substance-Related and Addictive Disorders (n=4,117)                | -17.3% | -21.8% | -2.0%  | -27.4%  | -34.7% | -1.7%  | -1.8%  | -5.0%  | 8.3%   | -20.8% | -23.2% | -12.2% |
| Feeding and Eating Disorders (n=3,553)                             | 13.1%  | 18.6%  | 12.0%  | -17.9%  | -6.3%  | -19.9% | 28.6%  | 35.1%  | 27.4%  | 27.3%  | 24.4%  | 28.0%  |
| Schizophrenia Spectrum and Other Psychotic Disorders (n=1,626)     | 4.5%   | -6.1%  | 10.8%  | -8.1%   | -24.8% | 3.4%   | 4.5%   | -8.7%  | 11.6%  | 15.6%  | 14.7%  | 16.1%  |
| Bipolar and Related Disorders (n=1,404)                            | -11.5% | -21.4% | -5.6%  | -37.4%  | -54.5% | -27.1% | -11.2% | -21.6% | -4.9%  | 15.7%  | 13.8%  | 16.9%  |
| Other                                                              |        |        |        |         |        |        |        |        |        |        |        |        |
| Elimination Disorders (n=389)                                      | -33.8% | -41.3% | -12.9% | -57.7%  | -54.2% | -68.4% | -24.4% | -41.1% | 18.2%  | -19.2% | -28.1% | 4.8%   |
| Fetal or Newborn Damage Related to Maternal Substance Abuse (n=11) | -42.9% | -50.0% | 0.0%   | -100.0% | 100.0% | 100.0% | 100.0% | 0.0%   | .      | -33.3% | -33.3% | .      |
| Mental Health Symptom (n=6,209)                                    | -29.2% | -31.4% | -7.1%  | -54.8%  | -57.4% | -24.5% | -12.9% | -16.6% | 20.7%  | -14.9% | -15.1% | -12.5% |
| Miscellaneous (n=4,154)                                            | -46.5% | -48.8% | -41.1% | -68.1%  | -70.7% | -61.2% | -19.8% | -20.6% | -18.1% | -39.4% | -40.4% | -36.8% |
| Motor Disorders (n=1,595)                                          | 13.8%  | 25.2%  | -23.6% | -54.9%  | -51.0% | -66.2% | 25.1%  | 35.7%  | -11.3% | 83.8%  | 100.0% | 24.0%  |
| Neurocognitive Disorders (n=913)                                   | -56.0% | -59.4% | -41.2% | -63.9%  | -71.8% | -25.7% | -39.1% | -42.6% | -25.9% | -57.8% | -57.8% | -57.9% |
| Personality Disorders (n=122)                                      | -49.4% | -66.1% | 5.3%   | -57.1%  | -87.0% | 80.0%  | -44.0% | -52.4% | 0.0%   | -46.4% | -55.6% | -30.0% |
| Sexuality and Gender Identity Disorders (n=92)                     | -26.4% | -28.6% | -25.0% | -50.0%  | -57.1% | -42.9% | 0.0%   | 25.0%  | -7.7%  | -31.8% | -30.0% | -33.3% |
| Sleep-Wake Disorders (n=178)                                       | -27.2% | -29.5% | -13.3% | -56.8%  | -53.1% | -80.0% | -21.1% | -35.3% | 100.0% | 3.6%   | 13.6%  | -33.3% |
| Somatic Symptom and Related Disorders (n=2,266)                    | -38.5% | -44.2% | -35.3% | -63.7%  | -65.9% | -62.5% | -24.4% | -37.8% | -15.4% | -26.4% | -30.2% | -24.5% |

36-week time intervals compared for spring-fall are 3/18/19-11/24/19 and 3/16/20-11/22/20. 12-week time intervals compared by season are: spring 3/18/19-6/9/19 vs. 3/16/20-6/7/20, summer 6/10/19-9/1/19 vs. 6/8/20-8/30/20, fall 9/2/19-11/24/19 vs. 8/31/20-11/22/20.

Percent change in emergency department discharges and hospitalizations for primary mental health diagnostic groups among 44 children's hospitals pre- and post-COVID-19 statewide school closure orders matched by 36- (spring-fall) and 12-week (season) time intervals by sociodemographic characteristics, payer type, and chronic complex condition count.

|                                   | Spring-Fall |        |          | Spring |        |          | Summer |        |          | Fall   |        |          |
|-----------------------------------|-------------|--------|----------|--------|--------|----------|--------|--------|----------|--------|--------|----------|
|                                   | Any         | ED     | Hospital | Any    | ED     | Hospital | Any    | ED     | Hospital | Any    | ED     | Hospital |
| Suicide or Self-Injury (n=33,633) | -2.5%       | -9.8%  | 12.8%    | -36.6% | -44.7% | -19.8%   | 21.6%  | 22.6%  | 20.0%    | 16.3%  | 5.7%   | 41.7%    |
| Age (years)                       |             |        |          |        |        |          |        |        |          |        |        |          |
| 3-5                               | -28.1%      | -28.6% | -25.0%   | 50.0%  | 50.0%  |          | -25.0% | -14.3% | -100%    | -45.0% | -52.9% | 0.0%     |
| 6-11                              | -34.6%      | -37.0% | -21.5%   | -68.2% | -70.2% | -57.4%   | -0.9%  | 1.4%   | -10.6%   | -14.2% | -18.8% | 14.8%    |
| 12-17                             | 3.3%        | -3.4%  | 15.5%    | -30.2% | -38%   | -16.4%   | 24.8%  | 26.6%  | 22.1%    | 22%    | 11.5%  | 43.8%    |
| Sex                               |             |        |          |        |        |          |        |        |          |        |        |          |
| Male                              | -20.8%      | -27.2% | -1.3%    | -44.7% | -51.4% | -23.9%   | 5.0%   | 6.8%   | 1.3%     | -11.9% | -20.7% | 19.6%    |
| Female                            | 6.7%        | 0.5%   | 17.8%    | -32.5% | -40.7% | -18.4%   | 29.4%  | 30.9%  | 27.1%    | 31.2%  | 22.0%  | 49.2%    |
| Race/ethnicity                    |             |        |          |        |        |          |        |        |          |        |        |          |
| White                             | 0.6%        | -6.5%  | 14.9%    | -33.3% | -41.8% | -16.3%   | 22.1%  | 22.6%  | 21.4%    | 20.3%  | 10.4%  | 42.6%    |
| Black                             | -11.8%      | -17.0% | -1.6%    | -46.5% | -50.1% | -39.8%   | 11.1%  | 20.8%  | -3.4%    | 12.3%  | -2.9%  | 50.3%    |
| Hispanic                          | -2.8%       | -9.0%  | 13.6%    | -38.3% | -46.5% | -16.4%   | 23.9%  | 21.7%  | 28.6%    | 13.9%  | 8.1%   | 30.8%    |
| Other                             | -1.7%       | -14.6% | 24.6%    | -32.5% | -45.8% | -4.5%    | 32.6%  | 27.2%  | 41.3%    | 8.8%   | -5.6%  | 41.3%    |
| Payer                             |             |        |          |        |        |          |        |        |          |        |        |          |
| Government                        | -7.1%       | -14.1% | 6.8%     | -39.3% | -47.2% | 40.8%    | 11.2%  | 13.2%  | 7.9%     | 13.1%  | 44.4%  | 39.7%    |
| Commercial                        | 2.4%        | -6.2%  | 21.2%    | -34.5% | -44.1% | -24.1%   | 33.8%  | 31.9%  | 37.3%    | 20.4%  | 1.7%   | 44.2%    |
| Self-pay                          | -5.2%       | -8.3%  | 3.4%     | -38.8% | -39.0% | -13.1%   | 38.1%  | 31.6%  | 55.6%    | 3.9%   | 10.4%  | 17.1%    |
| Other                             | 4.0%        | -7.9%  | 22.4%    | -19.5% | -24.0% | -38.2%   | 12.0%  | 72.7%  | -35.7%   | 16.9%  | -0.5%  | 94.7%    |
| Missing                           | 26.8%       | 40.2%  | -2.0%    | 21.3%  | 35.5%  | -12.5%   | 8.0%   | 44.4%  | -34.8%   | 46.7%  | -20.0% | 72.7%    |
| CCC Count                         |             |        |          |        |        |          |        |        |          |        |        |          |
| 0                                 | -2.0%       | -9.7%  | 17.9%    | -37.1% | -45.1% | -16.4%   | 23.7%  | 22.8%  | 25.7%    | 17.0%  | 6.3%   | 47.5%    |
| 1                                 | -6.4%       | -12.8% | -4.5%    | -29.2% | -28.0% | -29.5%   | 5.6%   | 20.6%  | 2.2%     | 8.4%   | -17.5% | 18.1%    |
| ≥2                                | -23.7%      | -23.5% | -23.7%   | -47.5% | 33.3%  | -51.8%   | -19.5% | -50.0% | -14.3%   | 0.0%   | -25.0% | 4.5%     |

|                                                 |        |        |        |        |        |        |        |        |        |        |        |        |
|-------------------------------------------------|--------|--------|--------|--------|--------|--------|--------|--------|--------|--------|--------|--------|
| Depressive Disorders (n=34,120)                 | -20.4% | -27.3% | -13.5% | -48.3% | -57.9% | -38.6% | 5.3%   | 9.7%   | 2.2%   | -9.0%  | -16.9% | 0.5%   |
| Age (years)                                     |        |        |        |        |        |        |        |        |        |        |        |        |
| 3-5                                             | -16.7% | -43.2% | 41.2%  | -50.0% | -76.9% | 66.7%  | 6.7%   | -44.4% | 83.3%  | -8.7%  | -13.3% | 0.0%   |
| 6-11                                            | -41.5% | -47.6% | -32.4% | -65.8% | -70.9% | -58.6% | -9.9%  | -11.0% | -8.7%  | -33.0% | -40.9% | -18.8% |
| 12-17                                           | -15.6% | -21.4% | -10.2% | -44.0% | -54.0% | -34.7% | 8.2%   | 15.1%  | 3.7%   | -3.4%  | -10.1% | 3.9%   |
| Sex                                             |        |        |        |        |        |        |        |        |        |        |        |        |
| Male                                            | -33.6% | -38.4% | -27.9% | -56.3% | -63.1% | -48.3% | -4.4%  | -4.6%  | -4.3%  | -27.7% | -30.9% | -22.9% |
| Female                                          | -12.8% | -19.9% | -6.2%  | -43.6% | -54.5% | -33.4% | 10.5%  | 18.5%  | 5.3%   | 2.0%   | -7.5%  | 12.3%  |
| Race/ethnicity                                  |        |        |        |        |        |        |        |        |        |        |        |        |
| White                                           | -14.5% | -22.1% | -7.5%  | -42.7% | -54.0% | -32.3% | 15.3%  | 19.9%  | 12.3%  | -5.5%  | -13.1% | 2.9%   |
| Black                                           | -25.4% | -28.8% | -21.6% | -54.3% | -60.4% | -47.5% | 0.0%   | 4.9%   | -4.2%  | -12.9% | -16.7% | -7.9%  |
| Hispanic                                        | -32.5% | -41.2% | -21.3% | -57.8% | -67%   | -46%   | -14.1% | -11.7% | -16.1% | -18.4% | -30.6% | 1.7%   |
| Other                                           | -19.6% | -19.1% | -20.1% | -48.6% | -52.2% | -45.5% | -1.2%  | 11.4%  | -9.5%  | -3.4%  | -5.0%  | -1.7%  |
| Payer                                           |        |        |        |        |        |        |        |        |        |        |        |        |
| Government                                      | -24.2% | -29.5% | -18.7% | -48.5% | -55.5% | -41.1% | -4.0%  | -2.4%  | -5.2%  | -14.0% | -19.9% | -6.6%  |
| Commercial                                      | -16.0% | -24.2% | -8.2%  | -47.7% | -60.5% | -35.8% | 17.4%  | 27.1%  | 11.4%  | -3.8%  | -13.0% | 6.5%   |
| Self-pay                                        | -21.8% | -29.9% | -7.4%  | -50.8% | -57.6% | -38.8% | 7.0%   | 16.4%  | -4.4%  | -11.3% | -25.5% | 17.9%  |
| Other                                           | -21.1% | -31.1% | -11.1% | -69.4% | -68.8% | -70.0% | -21.7% | -33.3% | -9.1%  | 35.5%  | 5.9%   | 71.4%  |
| Missing                                         | -41.1% | -44.8% | -37.0% | -52.6% | -72.7% | -25.0% | -50.0% | -50.0% | -50.0% | -21.1% | -10.0% | -33.3% |
| CCC Count                                       |        |        |        |        |        |        |        |        |        |        |        |        |
| 0                                               | -21.4% | -27.7% | -14.8% | -49.1% | -58.2% | -39.3% | 3.8%   | 8.9%   | -0.1%  | -10.0% | -17.2% | -0.7%  |
| 1                                               | 0.5%   | -9.0%  | 3.6%   | -32.0% | -41.2% | -29.1% | 33.7%  | 28.6%  | 35.2%  | 10.3%  | -1.3%  | 14.4%  |
| ≥2                                              | 21.9%  | 0.0%   | 26.4%  | -30.0% | -100%  | -12.5% | 52.6%  | 500%   | 27.8%  | 40.0%  | -16.7% | 57.9%  |
| Anxiety and Trauma-related Disorders (n=18,788) |        |        |        |        |        |        |        |        |        |        |        |        |
| Age (years)                                     |        |        |        |        |        |        |        |        |        |        |        |        |
| 3-5                                             | -50.3% | -49.7% | -52.6% | -51.7% | -55.8% | -25.0% | -47.2% | -40.5% | -62.5% | -51.3% | -50.0% | -57.1% |
| 6-11                                            | -31.2% | -31.2% | -31.1% | -49.0% | -52.0% | -37.2% | -14.0% | -11.9% | -21.8% | -25.8% | -24.2% | -31.6% |

|                                                                      |        |        |        |        |        |        |        |        |        |        |        |        |
|----------------------------------------------------------------------|--------|--------|--------|--------|--------|--------|--------|--------|--------|--------|--------|--------|
| 12-17                                                                | -17.4% | -19.2% | -11.9% | -38.1% | -43.9% | -17.9% | -4.0%  | -4.5%  | -2.5%  | -9.5%  | -8.1%  | -13.7% |
| Sex                                                                  |        |        |        |        |        |        |        |        |        |        |        |        |
| Male                                                                 | -27.7% | -26.9% | -30.8% | -43.8% | -47.5% | -29.2% | -13.4% | -9.5%  | -26.7% | -23.5% | -20.3% | -35.1% |
| Female                                                               | -17.9% | -20.6% | -9.3%  | -40.1% | -46.0% | -19.7% | -3.5%  | -5.6%  | 3.3%   | -8.8%  | -8.6%  | -9.3%  |
| Race/ethnicity                                                       |        |        |        |        |        |        |        |        |        |        |        |        |
| White                                                                | -22.5% | -24.0% | -18.6% | -43.7% | -49.9% | -25.6% | -8.7%  | -9.9%  | -5.8%  | -13.9% | -11.0% | -21.5% |
| Black                                                                | -22.2% | -24.2% | -14.3% | -43.5% | -46.5% | -31.2% | -1.7%  | -2.1%  | 0.0%   | -16.9% | -18.9% | -9.8%  |
| Hispanic                                                             | -23.4% | -24.6% | -16.4% | -39.6% | -42.6% | -20.9% | -15.9% | -16.4% | -11.8% | -14.3% | -14.0% | -15.6% |
| Other                                                                | -14.3% | -13.1% | -17.5% | -30.5% | -40.8% | 0.0%   | 8.5%   | 26.1%  | -29.3% | -16.4% | -14.7% | -21.1% |
| Payer                                                                |        |        |        |        |        |        |        |        |        |        |        |        |
| Government                                                           | -20.5% | -21.3% | -17.5% | -38.3% | -43.1% | -20.6% | -7.6%  | -6.4%  | -11.2% | -14.1% | -12.5% | -19.7% |
| Commercial                                                           | -23.4% | -25.3% | -17.6% | -46.7% | -52.3% | -28.4% | -6.2%  | -6.3%  | -5.7%  | -14.5% | -13.9% | -16.4% |
| Self-pay                                                             | -23.2% | -25.1% | -9.3%  | -35.6% | -40.8% | 0.0%   | -12.1% | -14.5% | 7.1%   | -20.5% | -19.3% | -28.6% |
| Other                                                                | -27.0% | -25.5% | -33.3% | -54.5% | -50.0% | -75.0% | 0.0%   | -8.3%  | 50.0%  | -18.5% | -14.3% | -33.3% |
| Missing                                                              | -52.3% | -59.5% | -14.3% | -45.5% | -70.0% | 200%   | -53.3% | -61.5% | 0.0%   | -55.6% | -50.0% | -75.0% |
| CCC Count                                                            |        |        |        |        |        |        |        |        |        |        |        |        |
| 0                                                                    | -22.1% | -23.4% | -17.7% | -41.6% | -46.6% | -22.4% | -8.2%  | -7.5%  | -10.6% | -14.8% | -13.6% | -18.8% |
| 1                                                                    | -14.0% | -15.1% | -12.9% | -44.7% | -49.2% | -39.7% | 18.0%  | 8.6%   | 31.0%  | -9.8%  | -1.6%  | -16.9% |
| ≥2                                                                   | -28.6% | -42.9% | -21.4% | 9.1%   | 0.0%   | 12.5%  | -46.7% | -50.0% | -45.5% | -37.5% | -57.1% | -22.2% |
| Disorder Likely Eligible for Special Education Resources (n=16, 012) | -36.4% | -42.2% | -22.2% | -50.1% | -56.3% | -34.2% | -25.6% | -31.6% | -13.0% | -31.2% | -37.0% | -18.9% |
| Age (years)                                                          |        |        |        |        |        |        |        |        |        |        |        |        |
| 3-5                                                                  | -46.8% | -50.2% | -37.1% | -60.0% | -60.9% | -57.7% | -36.9% | -38.7% | -32.7% | -43.5% | -50.3% | -18.2% |
| 6-11                                                                 | -42.1% | -49.0% | -26.1% | -57.4% | -65.0% | -38.0% | -28.4% | -35.3% | -15.7% | -37.7% | -43.2% | -24.1% |
| 12-17                                                                | -30.0% | -35.2% | -16.7% | -42.2% | -47.8% | -28.1% | -21.7% | -27.8% | -7.7%  | -25.2% | -29.5% | -13.6% |
| Sex                                                                  |        |        |        |        |        |        |        |        |        |        |        |        |
| Male                                                                 | -37.7% | -43.5% | -24.2% | -52.5% | -59.0% | -36.8% | -25.6% | -32.5% | -11.9% | -32.9% | -37.0% | -22.7% |

|                                                     |        |        |        |        |        |        |        |        |        |        |        |        |
|-----------------------------------------------------|--------|--------|--------|--------|--------|--------|--------|--------|--------|--------|--------|--------|
| Female                                              | -33.4% | -39.5% | -16.7% | -44.2% | -50.2% | -27.2% | -25.6% | -29.8% | -15.8% | -29.8% | -36.9% | -7.5%  |
| Race/ethnicity                                      |        |        |        |        |        |        |        |        |        |        |        |        |
| White                                               | -29.1% | -34.5% | -17.9% | -45.9% | -53.2% | -30.1% | -16.7% | -19.7% | -11.4% | -22.8% | -27.4% | -12.0% |
| Black                                               | -43.4% | -50.8% | -21.0% | -57.2% | -63.1% | -38.5% | -33.8% | -42.8% | -11.1% | -37.5% | -44.9% | -13.3% |
| Hispanic                                            | -46.5% | -51.9% | -29.2% | -52.8% | -59.8% | -30.5% | -34.3% | -40.4% | -17.6% | -49.3% | -53.1% | -36.4% |
| Other                                               | -33.8% | -32.8% | -35.7% | -43.2% | -41.9% | -45.8% | -28.5% | -33.5% | -19.8% | -30.0% | -24.6% | -39.6% |
| Payer                                               |        |        |        |        |        |        |        |        |        |        |        |        |
| Government                                          | -36.5% | -42.9% | -20.1% | -51.0% | -56.6% | -36.3% | -24.5% | -32.5% | -6.9%  | -31.9% | -37.8% | -15.8% |
| Commercial                                          | -34.6% | -39.2% | -25.1% | -46.9% | -55.4% | -27.8% | -26.5% | -27.3% | -25.3% | -30.2% | -33.5% | -22.9% |
| Self-pay                                            | -55.5% | -57.4% | -43.8% | -54.3% | -59.1% | -33.3% | -50.0% | -51.2% | -40.0% | -58.8% | -58.9% | -58.3% |
| Other                                               | -53.1% | -50.0% | -55.6% | -70.6% | -50.0% | -81.8% | -28.6% | -60.0% | 50.0%  | -37.5% | -33.3% | -40.0% |
| Missing                                             | -34.4% | -36.5% | 0.0%   | -56.1% | -59.0% | 0.0%   | -25.0% | -35.0% |        | -10.3% | -3.8%  | -66.7% |
| CCC Count                                           |        |        |        |        |        |        |        |        |        |        |        |        |
| 0                                                   | -37.3% | -42.5% | -23.0% | -50.4% | -56.4% | -32.4% | -26.6% | -31.9% | -14.1% | -33.4% | -37.4% | -21.8% |
| 1                                                   | -20.8% | -37.6% | -10.9% | -45.0% | -56.1% | -39.0% | -16.3% | -34.5% | -6.5%  | 1.2%   | -23.3% | 19.0%  |
| ≥2                                                  | -34.2% | 7.1%   | -39.8% | -55.8% | -60.0% | -55.3% | 6.3%   | 166.7% | -10.3% | -42.9% | -16.7% | -47.2% |
| Substance-Related and Addictive Disorders (n=4,117) | -17.3% | -21.8% | -2.0%  | -27.4% | -34.7% | -1.7%  | -1.8%  | -5.0%  | 8.3%   | -20.8% | -23.2% | -12.2% |
| Age (years)                                         |        |        |        |        |        |        |        |        |        |        |        |        |
| 3-5                                                 | -12.5% | -27.3% | 20.0%  | -22.2% | -16.7% | -33.3% | 50.0%  | 100%   | 0.0%   | -20.0% | -75.0% | 200%   |
| 6-11                                                | 58.3%  | 31.0%  | 171.4% | -22.2% | -35.7% | 25.0%  | 120%   | 55.6%  | 700%   | 162.5% | 150%   | 200%   |
| 12-17                                               | -18.5% | -22.6% | -4.6%  | -27.5% | -34.8% | -1.8%  | -3.7%  | -6.3%  | 4.2%   | -22.7% | -24.5% | -16.0% |
| Sex                                                 |        |        |        |        |        |        |        |        |        |        |        |        |
| Male                                                | -18.2% | -23.6% | 0.0%   | -26.0% | -34.7% | 7.6%   | -1.3%  | -3.7%  | 6.0%   | -25.2% | -28.9% | -12.6% |
| Female                                              | -15.7% | -19.2% | -3.7%  | -29.5% | -34.9% | -12.5% | -1.4%  | -5.9%  | 13.4%  | -14.4% | -15.5% | -10.3% |
| Race/ethnicity                                      |        |        |        |        |        |        |        |        |        |        |        |        |
| White                                               | -17.2% | -17.1% | -17.4% | -27.5% | -32.6% | -13.6% | -1.6%  | 0.9%   | -8.0%  | -21.5% | -18.4% | -30.7% |
| Black                                               | -5.8%  | -13.7% | 31.8%  | -35.7% | -40.5% | -12.5% | 16.9%  | 7.4%   | 56.5%  | 6.6%   | -2.9%  | 57.9%  |



|                                        |        |        |        |        |        |        |        |        |        |        |        |        |
|----------------------------------------|--------|--------|--------|--------|--------|--------|--------|--------|--------|--------|--------|--------|
| Hispanic                               | -23.9% | -30.8% | 3.8%   | -25.6% | -31.5% | -2.2%  | -16.2% | -24.4% | 14.3%  | -28.8% | -35.4% | 0.0%   |
| Other                                  | -17.3% | -27.8% | 20.0%  | -18.2% | -39.7% | 86.7%  | 8.6%   | 7.0%   | 13.3%  | -35.0% | -38.3% | -25.0% |
| Payer                                  |        |        |        |        |        |        |        |        |        |        |        |        |
| Government                             | -14.4% | -19.4% | 2.5%   | -29.2% | -34.0% | -10.2% | -0.5%  | -7.2%  | 19.6%  | -11.3% | -14.2% | -2.1%  |
| Commercial                             | -19.2% | -24.7% | -1.5%  | -21.3% | -34.7% | 19.7%  | -4.4%  | -6.8%  | 3.3%   | -29.9% | -30.8% | -26.9% |
| Self-pay                               | -26.6% | -23.0% | -41.2% | -35.1% | -29.3% | -50.0% | -5.9%  | 10.5%  | -53.8% | -36.1% | -41.1% | 20.0%  |
| Other                                  | -33.3% | -33.3% | -33.3% | -60.0% | -77.8% | 100%   | 133.3% | 500%   | -50.0% | -54.5% | -50.0% | -66.7% |
| Missing                                | -9.5%  | -20.0% | 200%   | -40.0% | -50.0% | 0.0%   | 0.0%   | -20.0% |        | 0.0%   | 0.0%   |        |
| CCC Count                              |        |        |        |        |        |        |        |        |        |        |        |        |
| 0                                      | -17.4% | -22.6% | 3.3%   | -27.4% | -35.4% | 4.8%   | 1.9%   | -4.5%  | 25.4%  | -23.6% | -24.8% | -18.5% |
| 1                                      | -12.8% | 6.7%   | -25.0% | -28.2% | -22.2% | -33.3% | -38.0% | -9.5%  | -58.6% | 53.6%  | 150%   | 27.3%  |
| ≥2                                     | -37.5% | 0.0%   | -42.9% | -20.0% |        | -60.0% | -71.4% | -100%  | -60.0% | 0.0%   |        | 0.0%   |
| Feeding and Eating Disorders (n=3,553) | 13.1%  | 18.6%  | 12.0%  | -17.9% | -6.3%  | -19.9% | 28.6%  | 35.1%  | 27.4%  | 27.3%  | 24.4%  | 28.0%  |
| Age (years)                            |        |        |        |        |        |        |        |        |        |        |        |        |
| 3-5                                    | -11.5% | 25.0%  | -42.9% | -62.5% | -50.0% | -66.7% | 0.0%   | 66.7%  | -28.6% | 25.0%  | 28.6%  | 0.0%   |
| 6-11                                   | -7.6%  | -31.6% | -1.4%  | -26.2% | -53.3% | -18.0% | 4.2%   | -10.0% | 7.9%   | 1.4%   | -23.1% | 6.9%   |
| 12-17                                  | 16.2%  | 26.6%  | 14.3%  | -15.9% | 6.5%   | -19.4% | 31.9%  | 40.6%  | 30.4%  | 30.7%  | 30.1%  | 30.8%  |
| Sex                                    |        |        |        |        |        |        |        |        |        |        |        |        |
| Male                                   | -9.3%  | -6.1%  | -10.0% | -44.3% | -23.1% | -47.6% | 13.3%  | -12.5% | 19.4%  | 7.8%   | 10.0%  | 7.1%   |
| Female                                 | 17.5%  | 23.9%  | 16.2%  | -12.0% | -3.0%  | -13.6% | 31.7%  | 47.5%  | 28.9%  | 30.5%  | 27.2%  | 31.3%  |
| Race/ethnicity                         |        |        |        |        |        |        |        |        |        |        |        |        |
| White                                  | 17.7%  | 21.5%  | 17.1%  | -21.4% | -10.4% | -23.1% | 36.9%  | 51.2%  | 34.7%  | 37.4%  | 26.1%  | 39.6%  |
| Black                                  | -13.0% | 7.1%   | -18.2% | -50.0% | -25.0% | -55.0% | 23.5%  | -33.3% | 35.7%  | -3.6%  | 42.9%  | -19.0% |
| Hispanic                               | -2.5%  | -10.7% | 0.5%   | -19.8% | -29.4% | -17.4% | 0.0%   | 5.0%   | -1.3%  | 9.9%   | -10.5% | 22.2%  |
| Other                                  | 18.7%  | 78.1%  | 8.6%   | 17.5%  | 60.0%  | 9.4%   | 32.9%  | 46.2%  | 29.8%  | 8.1%   | 144.4% | -7.8%  |
| Payer                                  |        |        |        |        |        |        |        |        |        |        |        |        |
| Government                             | -0.4%  | 6.6%   | -2.3%  | -29.9% | -16.7% | -33.1% | 22.2%  | 41.4%  | 18.0%  | 8.1%   | 3.6%   | 9.8%   |
| Commercial                             | 20.9%  | 26.0%  | 20.1%  | -12.7% | -4.8%  | -13.8% | 36.6%  | 41.5%  | 35.8%  | 36.8%  | 36.5%  | 36.9%  |

|                                                                |        |        |        |        |        |        |        |        |        |        |        |       |
|----------------------------------------------------------------|--------|--------|--------|--------|--------|--------|--------|--------|--------|--------|--------|-------|
| Self-pay                                                       | 4.2%   | 0.0%   | 7.1%   | 50.0%  | 0.0%   | 60.0%  | -55.6% | -50.0% | -66.7% | 33.3%  | 100%   | 0.0%  |
| Other                                                          | -21.7% | 400%   | -40.9% | -42.9% |        | -71.4% | -55.6% | -100%  | -50%   | 42.9%  |        | 0.0%  |
| Missing                                                        | 75.0%  | 200%   | 33.3%  | 200%   |        | 100%   | 100%   |        | -100%  | 0.0%   | -100%  | 100%  |
| CCC Count                                                      |        |        |        |        |        |        |        |        |        |        |        |       |
| 0                                                              | 0.4%   | 16.7%  | -7.6%  | -17.0% | -14.3% | -18.1% | -3.1%  | 37.9%  | -20.3% | 18.0%  | 24.3%  | 14.2% |
| 1                                                              | 25.9%  | 35.1%  | 25.4%  | -14.0% | 116.7% | -17.3% | 56.6%  | 9.1%   | 59.2%  | 36.7%  | 25.0%  | 37.6% |
| ≥2                                                             | 11.5%  | -33.3% | 12.2%  | -35.9% | -66.7% | -34.4% | 50.0%  |        | 48.1%  | 24.3%  |        | 24.3% |
| Schizophrenia Spectrum and Other Psychotic Disorders (n=1,626) | 4.5%   | -6.1%  | 10.8%  | -8.1%  | -24.8% | 3.4%   | 4.5%   | -8.7%  | 11.6%  | 15.6%  | 14.7%  | 16.1% |
| Age (years)                                                    |        |        |        |        |        |        |        |        |        |        |        |       |
| 3-5                                                            | 150%   | 100%   |        |        |        |        | -100%  | -100%  |        |        |        |       |
| 6-11                                                           | -20.3% | -34.1% | -5.3%  | -32.1% | -52.9% | 0.0%   | 16.7%  | 66.7%  | -8.3%  | -30.3% | -50.0% | -6.7% |
| 12-17                                                          | 6.9%   | -2.4%  | 11.9%  | -6.8%  | -22.6% | 2.9%   | 4.5%   | -11.9% | 13.0%  | 21.3%  | 27.4%  | 18.2% |
| Sex                                                            |        |        |        |        |        |        |        |        |        |        |        |       |
| Male                                                           | 2.5%   | -6.7%  | 8.0%   | -3.9%  | -26.2% | 11.0%  | 15.3%  | 10.2%  | 17.8%  | -2.9%  | -1.5%  | -3.7% |
| Female                                                         | 7.5%   | -5.1%  | 14.9%  | -14.6% | -22.5% | -8.9%  | -9.6%  | -30.2% | 2.8%   | 45.8%  | 47.1%  | 45.5% |
| Race/ethnicity                                                 |        |        |        |        |        |        |        |        |        |        |        |       |
| White                                                          | 2.3%   | 0.0%   | 3.4%   | -18.9% | -6.5%  | -25.4% | 8.3%   | -13.3% | 20.4%  | 18.2%  | 22.0%  | 16.4% |
| Black                                                          | 14.1%  | -18.6% | 37.0%  | -10.5% | -51.4% | 28.2%  | 22.9%  | -12.5% | 45.1%  | 27.0%  | 12.1%  | 35.7% |
| Hispanic                                                       | -8.6%  | 1.5%   | -14.4% | 3.8%   | -9.5%  | 12.9%  | -28.4% | 15.0%  | -46.8% | 1.5%   | 0.0%   | 2.5%  |
| Other                                                          | 11.1%  | 0.0%   | 17.7%  | 10.0%  | -16.7% | 27.8   | 16.1%  | -30.0% | 38.1%  | 7.9%   | 33.3%  | -8.7% |
| Payer                                                          |        |        |        |        |        |        |        |        |        |        |        |       |
| Government                                                     | 11.7%  | -1.1%  | 20.0%  | -2.6%  | -19.4% | 10.5%  | 10.9%  | -5.6%  | 19.6%  | 25.6%  | 21.2%  | 28.4% |
| Commercial                                                     | -11.1% | -22.1% | -5.7%  | -22.4% | -37.0% | -15.5% | -11.1% | -32.4% | 1.6%   | -1.9%  | 3.2%   | -4.1% |
| Self-pay                                                       | 17.4%  | -25.0% | 63.6%  | 10.0%  | -42.9  | 133.3% | 50.0%  | 300%   | 0.0%   | 0.0%   | -75.0% | 100%  |
| Other                                                          | 125%   |        | 25.0%  |        |        |        | 33.3%  |        | -33.3% | 200%   |        | 100%  |
| Missing                                                        | 100%   | 400%   | -50.0% |        |        |        | 200%   |        | 0.0%   | 50.0%  | 200%   | -100% |

|           |       |       |       |        |        |        |       |        |       |       |       |       |
|-----------|-------|-------|-------|--------|--------|--------|-------|--------|-------|-------|-------|-------|
| CCC Count |       |       |       |        |        |        |       |        |       |       |       |       |
| 0         | 3.0%  | -9.0% | 11.2% | -3.7%  | -26.5% | 15.5%  | 0.0%  | -12.1% | 7.5%  | 11.3% | 11.1% | 11.4% |
| 1         | 13.7% | 100%  | 4.5%  | -34.5% | 33.3%  | -42.3% | 43.5% | 300%   | 31.8% | 47.6% | 100%  | 38.9% |
| ≥2        | 38.5% |       | 30.8% | -40.0% |        | -40.0% | 50.0% |        | 50.0% | 125%  |       | 100%  |

36-week time intervals compared for spring-fall are 3/18/19-11/24/19 and 3/16/20-11/22/20. 12-week time intervals compared by season are: spring 3/18/19-6/9/19 vs. 3/16/20-6/7/20, summer 6/10/19-9/1/19 vs. 6/8/20-8/30/20, fall 9/2/19-11/24/19 vs. 8/31/20-11/22/20. Blank cells correspond to 0 cases in 2019.
